# Supplementary material for: Supramolecular amphiphilic multiarm hyperbranched copolymer: synthesis, self-assembly and drug delivery applications
Source: Royal Society of Chemistry journal article supplement (doi:10.1039/c2py20573d), 2012-08-29
Supplement: c2py20573d.pdf [file c2py20573d.pdf]

*Supplementary Information*

Supramolecular amphiphilic multiarm hyperbranched copolymer: synthesis,  
self-assembly and drug delivery applications

Dali Wang,<sup>+a</sup> Hongying Chen,<sup>+b</sup> Yue Su,<sup>\*a</sup> Feng Qiu,<sup>a</sup> Lijuan Zhu,<sup>a</sup> Xiuying Huan,<sup>a</sup> Bangshang Zhu,<sup>c</sup> Deyue Yan<sup>a</sup> Fulin Guo<sup>\*b</sup> and Xinyuan Zhu<sup>\*ac</sup>

<sup>a</sup> *School of Chemistry and Chemical Engineering, State Key Laboratory of Metal Matrix Composites, Shanghai*

*Jiao Tong University, 800 Dongchuan Road, Shanghai 200240, P. R. China.*

<sup>b</sup> *Department of Oral and Maxillofacial Surgery, The First Affiliated Hospital of Harbin Medical University, 23*

*Youzheng Street, Nangang District, Harbin 150001, P. R. China.*

<sup>c</sup> *Instrumental Analysis Center, Shanghai Jiao Tong University, 800 Dongchuan Road, Shanghai 200240, P. R.*

*China.*

<sup>+</sup> These authors are joint first authors.

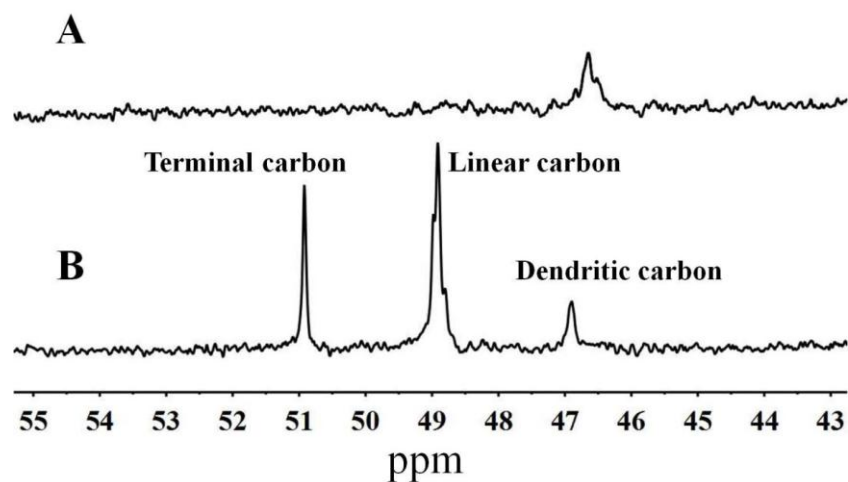

**Figure S1.**  $^{13}\text{C}$  NMR spectra of (A) H40-*star*-PCL in  $\text{CDCl}_3$  and (B) purified H40 in  $\text{DMSO}-d_6$ .

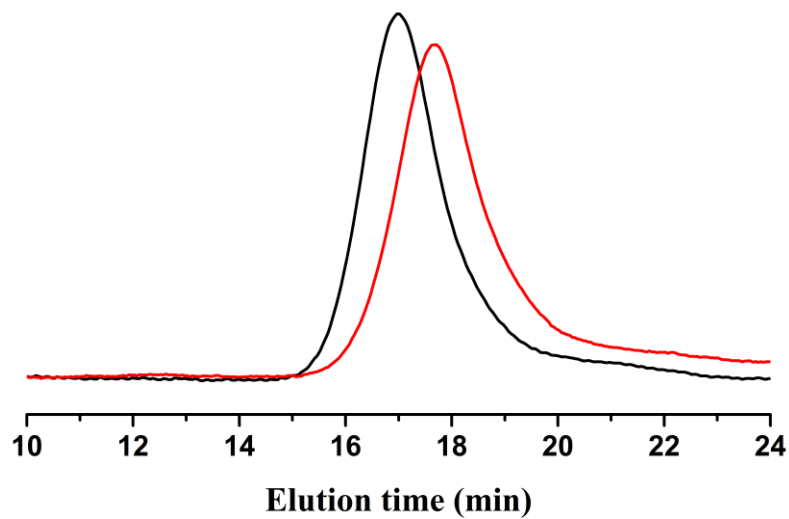

**Fig. S2.** GPC-MALLS curves of H40-*star*-PCL (red) and H40-*star*-PCL-A (black).

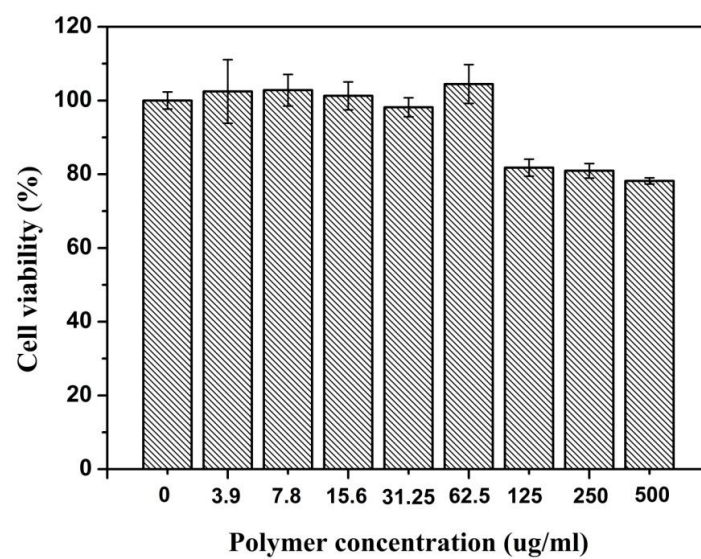

**Fig. S3.** Cell viability of NIH/3T3 cells against H40-*star*-PCL-A:U-PEG micelles after cultured for 24 h with different micelle concentrations.
